# Supplementary material for: Catalytic deoxygenation of bio-based 3-hydroxydecanoic acid to secondary alcohols and alkanes
Source: Royal Society of Chemistry journal article supplement (doi:10.1039/d0gc00691b), 2020-01-01
Supplement: d0gc00691b1.pdf [file d0gc00691b1.pdf]

## Supporting Information

### Catalytic Deoxygenation of Bio-Based 3-Hydroxydecanoic Acid to Secondary Alcohols and Alkanes

Joel B. Mensah, Adrian H. Hergesell, Sebastian Brosch, Christiane Golchert, Jens Artz, Regina Palkovits\*

*Institute of Technical and Macromolecular Chemistry, Worringerweg 2, 52074 Aachen, Germany*

#### Prolongation of the reaction time

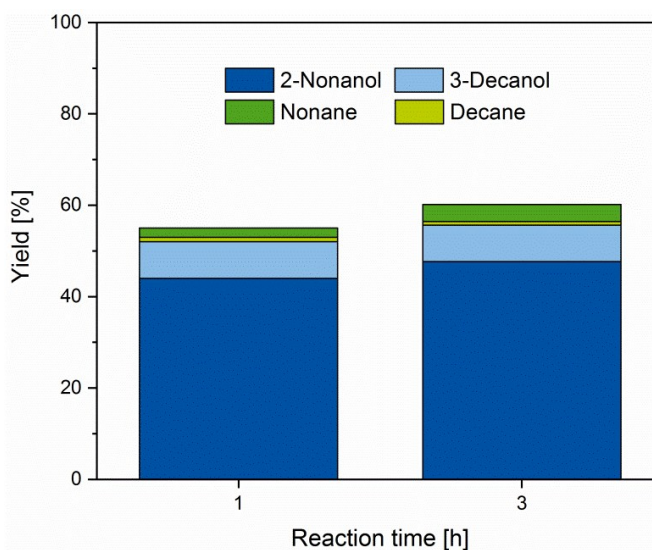

**Fig. S1:** Prolongation of reaction time from 1 to 3 h. Conditions: 25 mg 5 wt.% Ru/C, 250 mg 3-HDA, 5 ml water, 100 bar H<sub>2</sub>, 200 °C.

#### N<sub>2</sub>-Physisorption

N<sub>2</sub>-physisorption was measured on a Quadrasorb SI (3P Instruments). Before the measurement, the samples were degassed in a FloVac degasser at 200 °C at reduced pressure overnight. The measurements were conducted at -196 °C and the data was evaluated using the software QuadraWin (3P Instruments). For the determination of the specific surface area  $S_{\text{BET}}$ , the BET model was applied ( $0.05 \leq p/p_0 \leq 0.2$ ). The total pore volume  $V_{\text{pore}}$  was calculated from the highest relative pressure ( $p/p_0 = 0.95\text{--}0.98$ ).

**Table S1:** Textural properties of the MFI-structured catalyst supports.

| Support     | Si:Al ratio     | S <sub>BET</sub> [m <sup>2</sup> g <sup>-1</sup> ] | V <sub>pore</sub> [cm <sup>3</sup> g <sup>-1</sup> ] |
|-------------|-----------------|----------------------------------------------------|------------------------------------------------------|
| Silicalite  | ∞ <sup>a)</sup> | 352                                                | 0.25                                                 |
| HZSM-5 (40) | 40              | 436                                                | 0.25                                                 |
| HZSM-5 (15) | 15              | 358                                                | 0.20                                                 |

a) Does not contain any Al but only Si.

### Initial pH of the catalytic systems (see also to Fig. 3 in the main article)

**Table S2:** Initial pH values of the reaction systems presented in Fig 3. Reaction conditions: 5 wt.% Ru-cat., 250 mg 3-HDA, 5 ml H<sub>2</sub>O, 100 bar H<sub>2</sub>, 200 °C, 1 h.

| Entry | Catalyst             | Brønsted acidic additive              | pH <sub>0</sub> | Total yield [%] |
|-------|----------------------|---------------------------------------|-----------------|-----------------|
| 1     | -                    | -                                     | 3.44            | -               |
| 2     | 50 mg Ru/C           | -                                     | 4.11            | 91              |
| 3     | 50 mg Ru/C           | 2 wt.% H <sub>2</sub> SO <sub>4</sub> | 2.42            | 56              |
| 4     | 50 mg Ru/C           | 50 mg HZSM-5 (15)                     | 3.30            | 78              |
| 5     | 50 mg Ru/HZSM-5 (15) | -                                     | 2.70            | 84              |

As depicted in Table S2 all of the discussed systems had an acidic pH<sub>0</sub> value ranging from 2.7 to 4.1 resulting from the deprotonation of the acid in the aqueous solvent. The highest activity (91%) was achieved at the highest pH<sub>0</sub> = 4.11 for neat Ru/C (entry 2), while the lowest (56%) was found for the lowest pH<sub>0</sub> of 2.42 for Ru/C + 2wt.% H<sub>2</sub>SO<sub>4</sub> (entry 3). Both systems involving HZSM-5 (15) lie in between (entries 4 and 5). However, a small deviation from the general trend is found when comparing the latter two. The use of bifunctional Ru/HZSM-5 (15) despite its lower pH<sub>0</sub> results in slightly higher yields than Ru/C + HZSM-5 (15). This is believed to be rooted in the physical mixing of both solid catalysts in case of Ru/C + HZSM-5 (15), which effectively leads to slightly lower active surface areas *e.g.* when two different particles of each catalyst type agglomerate. In case of the bifunctional Ru/HZSM-5 (15), the reaction is expected to occur faster than over Ru/C + co-catalyst, since the decarbonylation, dehydration, and hydrogenation can all take place on one catalyst in close proximity and are thus less subjected to mass transfer effects.

### TPD-analysis and peak deconvolution (see also Fig. 4 in the main article)

The analysis of the TPD-signals and interpretation was performed with the help of the Origin 2018 software. A baseline correction was performed and peak deconvolution was achieved using a Gaussian fit. The amount of weak or strong acid sites corresponds to the sum of their respective peak areas. In case a peak stretched over a broad range and thus into both the low and high-temperature regime, a separate integration of the deconvoluted peak was performed and the value was assigned to the respective acidity (*e.g.* integration from 370-600 °C and assignment to strong acid sites). In accordance with the literature, the low-temperature region corresponding to weak acidity was set to 100-370 °C, while the high-temperature region corresponding to strong acidity was set to 370-600 °C.

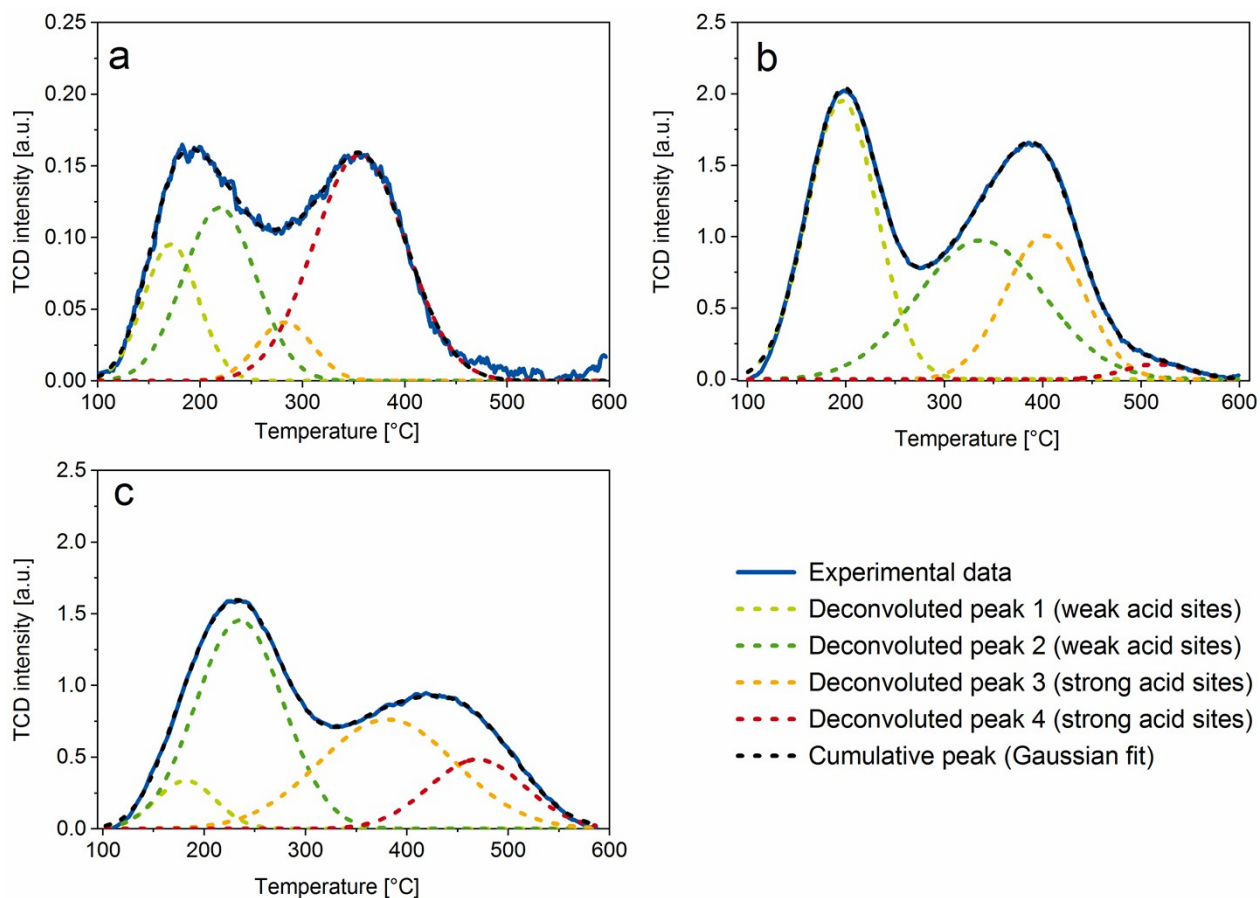

**Fig. S2:** Deconvoluted TPD-profiles for a) Silicalite, b) HZSM-5 (40), and HZSM-5 (15).

Variation of Si:Al ratio in the support of the bifunctional Ru-catalyst (see also Fig. 5 in the main article)

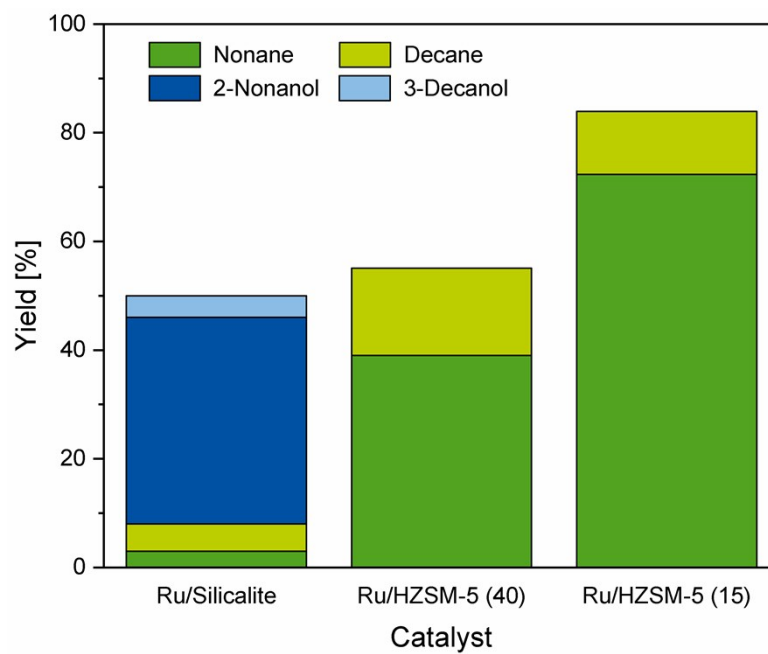

**Fig. S3:** Catalytic performance over variation of the Si:Al ratio in the tested MFI-structured supports. Conditions: 50 mg cat. (5 wt.% Ru), 250 mg 3-HDA, 5 ml water, 100 bar H<sub>2</sub>, 200 °C, 1 h.

### Pyridine IR-spectroscopy (see also Table 1 in the main article)

The respective peak area was determined with Origin 2018 using a baseline fit and the built-in peak area integration function. The peak region corresponding to the Lewis acidity (L) was first deconvoluted using a Gaussian fit, to extract the sole contribution of the Lewis acidic species at around 1455 cm<sup>-1</sup>. Equations (1)-(3), previously reported by Zhu *et al.*,<sup>1</sup> were employed to calculate the Brønsted and Lewis acidity, where  $a_{total}$  denotes the total acidity obtained *via* NH<sub>3</sub>-TPD and  $R_{L/B}$  the ratio of Lewis to Brønsted acidity determined from the peak areas after pyridine FT-IR. For the latter, the extinction coefficients reported by Emeis (1.67 cm μmol<sup>-1</sup> for the Brønsted acid sites at around 1545 cm<sup>-1</sup> and 2.22 cm μmol<sup>-1</sup> for the Lewis acid site at around 1455 cm<sup>-1</sup>) were applied.<sup>2</sup>

$$R_{L/B} = \frac{a_L}{a_B} \quad [-] \quad (1)$$

$$a_B = \frac{a_{total}}{1 + R_{L/B}} \quad [\text{mmol g}^{-1}] \quad (2)$$

$$a_L = \frac{a_{total} * R_{L/B}}{1 + R_{L/B}} \quad [\text{mmol g}^{-1}] \quad (3)$$

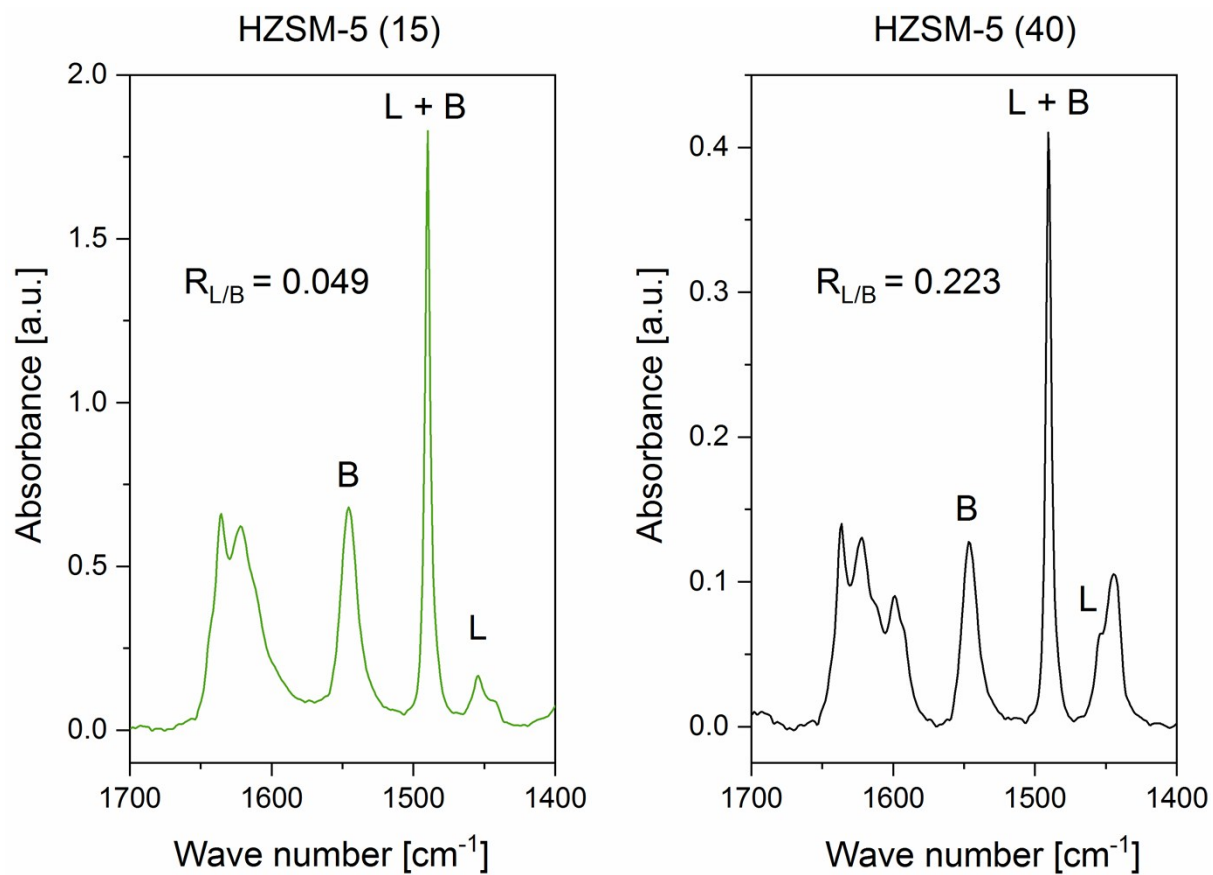

Fig. S4: FT-IR of adsorbed pyridine and respective  $R_{L/B}$  values for HZSM-5 (15) and HZSM-5 (40).

**Additional plot for alkane yield over acid concentration (see also Fig. 5 in the main article)**

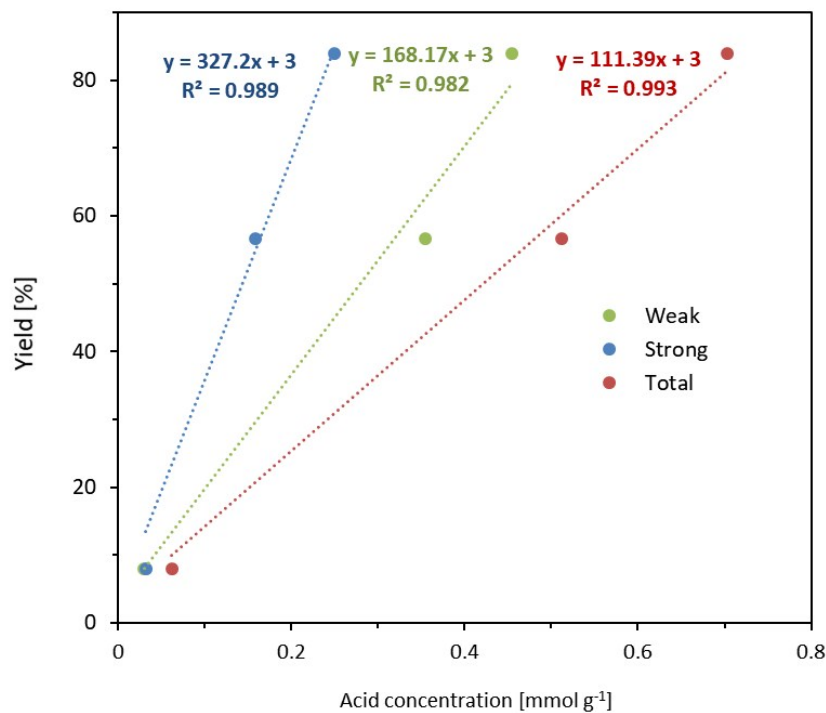

Fig. S5: Alkane yield over acid concentration of weak, strong, and total acid sites.

#### Testing of different substrates (see also Scheme 2b in the main article)

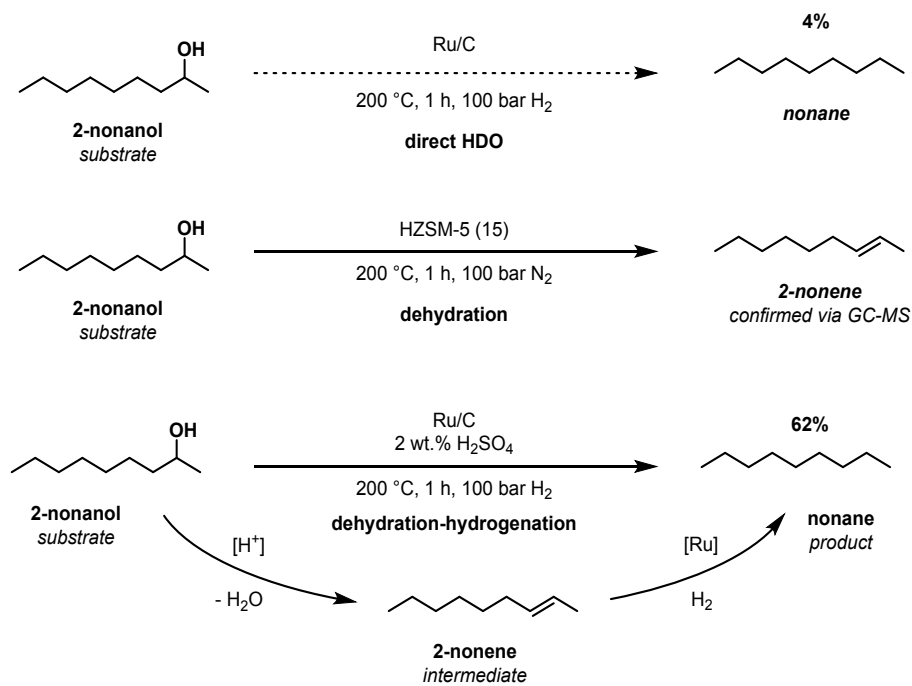

Scheme S1: Conversion of 2-nonanol over HZSM-5 (15) under N<sub>2</sub>-atmosphere, and over Ru/C and H<sub>2</sub>SO<sub>4</sub> under H<sub>2</sub>-atmosphere.

#### Testing of different substrates and gas phase analysis (see also Scheme 2 and 3 in the main article)

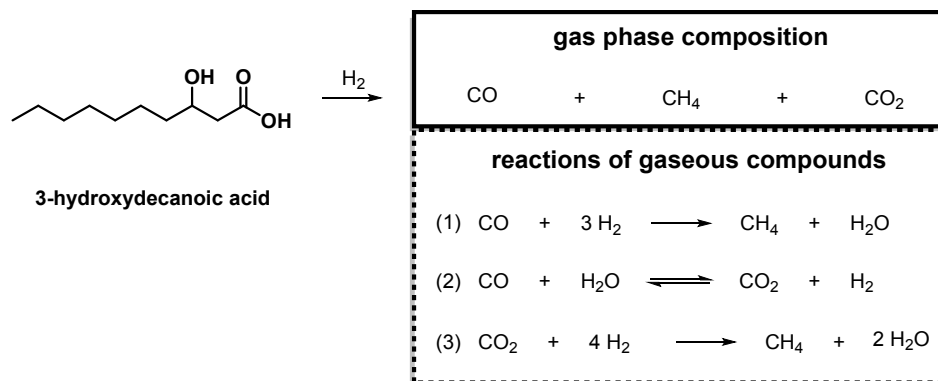

**Scheme S2:** Qualitative analysis of the gaseous phase and possible reactions of gaseous compounds, *i.e.* Sabatier reaction (1) and (3) besides water-gas-shift reaction (2).

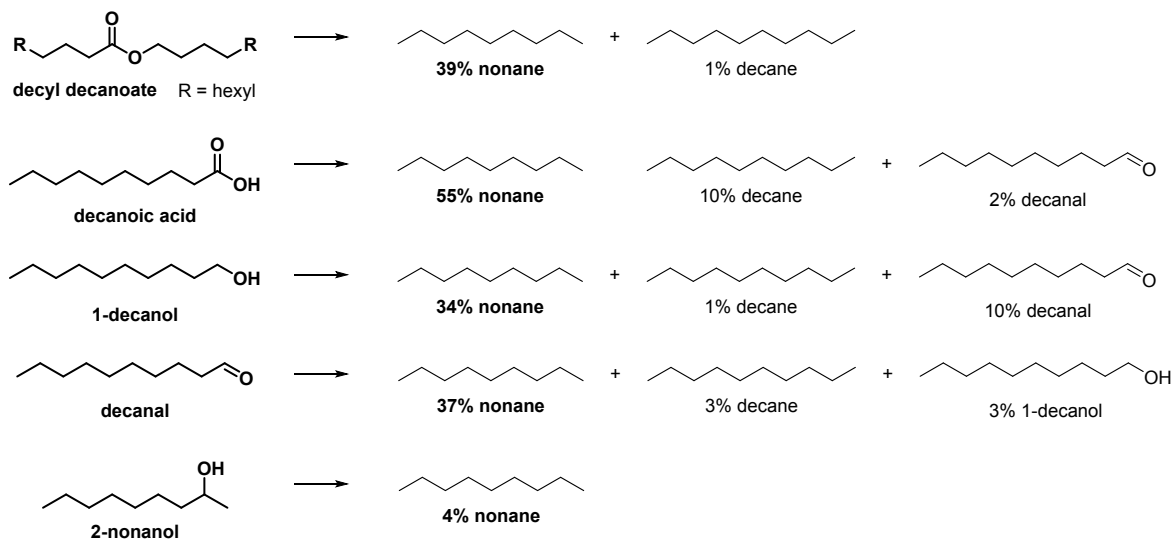

**Scheme S3:** Ru/C-catalyzed conversion of different substrates for the proposed reaction network under H<sub>2</sub>-pressure.

**Table S3:** Comparison of solid Ru/C and Ru/HZSM-5 (10) to a soluble RuCl<sub>3</sub>-catalyst. Reaction conditions: 4.7 mol% Ru, 250 mg 3-HDA, 5 ml H<sub>2</sub>O, 100 bar H<sub>2</sub>, 200 °C, 1 h.

| Catalyst          | Product yields [%] |           |           |        |        |
|-------------------|--------------------|-----------|-----------|--------|--------|
|                   | 2-Nonanol          | 1-Decanal | 3-Decanal | Nonane | Decane |
| RuCl <sub>3</sub> | 23                 | 1         | 3         | 10     | 2      |
| Ru/C              | 79                 | -         | 6         | 7      | 1      |
| Ru/HZSM-5 (15)    | -                  | -         | -         | 72     | 12     |



## Circulation experiments

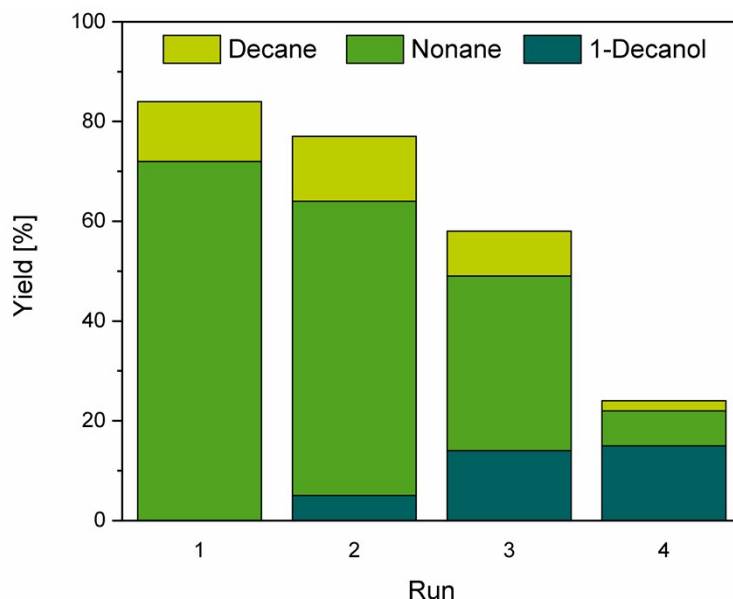

**Fig S6:** Circulation experiments for Ru/HZSM-5 (15). Conditions: Initially 50 mg cat. (5 wt.% Ru), 250 mg 3-HDA, 5 ml H<sub>2</sub>O, 100 bar H<sub>2</sub>, 200 °C, 1 h. The substrate to catalyst ratio was adjusted after each run to account for the material loss during recycling procedure.

To generate further insights on the catalyst stability of Ru/HZSM-5 (15), a recycling study was performed, in which the same batch of the catalyst was subjected to four subsequent deoxygenation reactions. After each run, the catalyst was separated from the organic phase *via* centrifugation, then carefully washed with water and isopropanol and finally dried at 60 °C in air overnight. The subsequent recycling runs were scaled down so that the substrate to catalyst ratio stayed constant over all experiments. A significant decrease of the total yields was observed over the course of four catalytic cycles with the most pronounced decline occurring after the third run. Moreover, a shift in the selectivity to primary alcohols, *i.e.* 1-decanol was found. The results show that further investigations are necessary to improve the long-term performance of the catalyst regarding its activity and selectivity.

## References

- 1 H. Zhu, A. Ramanathan, J.-F. Wu and B. Subramaniam, *ACS Catal.*, 2018, **8**, 4848–4859.
- 2 C. A. Emeis, *J. Catal.*, 1993, **141**, 347–354.
